# Supplementary material
Source: HighWire-hosted journal article supplement (https://gut.bmj.com/content/68/2/248)
Supplement: inline-supplementary-material-5 [file inline-supplementary-material-5.xls]

## Sheet: Dataset 4.1
Supplementary dataset S4.1. Spearman correlation analysis between the bacterial species identified and obesity traits
r Value	Parabacteroides goldsteinii	Flintibacter butyricus	Ruminococcus gnavus	Intestinimonas butyriciproducens	Clostridium cocleatum	Lactococcus lactis	Lactobacillus johnsonii	Clostridium viride	Anaerotruncus colihominis	Lactobacillus reuteri	Ruminococcus flavefaciens	Butyrivibrio hungatei	Butyrivibrio proteoclasticus	Ochrobactrum anthropi	Ruminococcus bromii	Achromobacter insolitus	Delftia acidovorans	Haemophilus haemolyticus	Pseudobutyrivibrio ruminis	Lachnospira pectinoschiza	Butyrivibrio fibrisolvens	Butyricicoccus pullicaecorum	Lactobacillus animalis	Akkermansia muciniphila	Pseudoflavonifractor capillosus	Flavonifractor plautii	Bacteroides acidifaciens	Mucispirillum schaedleri	Pseudomonas aeruginosa	Dorea longicatena	Escherichia coli	Romboutsia timonensis	Shewanella algae	Sphingomonas echinoides	Bifidobacterium pseudolongum	Streptococcus dentisani	Peptoniphilus gorbachii	Serratia marcescens	Corynebacterium tuberculostearicum	Ralstonia pickettii
Body weight change	-0.308377	-0.0407119	-0.139488	-0.31763	-0.167835	-0.113917	-0.0162547	-0.120814	-0.11157	-0.0126949	-0.398657	-0.33083	-0.260087	-0.490368	-0.291953	-0.0121503	-0.373325	-0.0313784	-0.20273	-0.314683	-0.262383	-0.0761837	0.0743461	0.14012	-0.0224794	0.235674	0.19822	0.160863	-0.12525	0.184003	0.107008	0.277673	0.101469	0.205112	0.308011	0.029757	-0.0961103	-0.0558399	0.000516556	-0.0591585
Visceral fat pad	-0.251863	-0.249388	-0.147942	-0.367079	-0.202337	-0.018467	-0.00779337	-0.258093	-0.20105	0.00423163	-0.415328	-0.357994	-0.269636	-0.182048	-0.279106	0.0788623	-0.365088	0.0367298	-0.137536	-0.348126	-0.221953	-0.14203	0.046522	-0.00378704	-0.13955	0.187827	0.144383	0.218712	0.0607341	0.136834	0.294327	0.20247	0.237873	0.164715	0.22393	0.167326	0.0717967	0.139743	0.0340927	-0.0237234
Pathological CLS score	-0.489619	-0.039651	-0.152874	-0.20217	-0.212698	-0.373976	0.0162875	0.0489389	-0.34943	0.0415308	-0.499576	-0.584749	-0.528008	-0.408363	-0.591701	-0.302433	-0.352449	-0.351089	-0.537026	-0.453484	-0.513433	0.105344	0.266016	0.315682	0.124739	0.402145	0.167543	0.367443	-0.0772393	0.418101	0.00389634	0.469447	0.284611	0.297542	0.443283	-0.102229	0.2415	-0.0675591	-0.313186	-0.245336
Pathological NAI score	-0.52773	-0.181639	-0.239423	-0.376617	-0.291434	-0.23945	-0.173058	-0.119613	-0.302147	-0.0576242	-0.514816	-0.521324	-0.514321	-0.568107	-0.592914	-0.210025	-0.481238	-0.316634	-0.33306	-0.508233	-0.37823	-0.0401586	0.0299165	0.190853	0.0107553	0.332145	0.203364	0.311576	-0.127215	0.324792	0.133038	0.413493	0.320795	0.290643	0.447281	0.027077	-0.0241896	0.0464146	-0.00650048	-0.136952
HOMA-IR index	-0.291467	-0.121691	-0.160845	-0.265063	-0.21458	-0.144399	-0.210866	-0.130827	-0.162446	-0.0694878	-0.499409	-0.321108	-0.343768	-0.182998	-0.376088	-0.102475	-0.192907	0.0943785	-0.257915	-0.371376	-0.360296	-0.0271924	-0.141124	-0.0846514	-0.0175829	0.166685	0.204894	0.10168	-0.145717	0.0952275	0.146162	0.191345	0.230975	0.223414	0.271404	0.0837773	-0.236843	-0.0154634	0.0485562	0.0429424
Serum IL-1β	-0.344421	-0.16663	-0.149722	-0.267513	-0.247301	-0.247414	-0.0612336	-0.118589	-0.224703	-0.00423163	-0.536858	-0.512114	-0.437751	-0.241386	-0.489443	-0.0997241	-0.306897	-0.14546	-0.428334	-0.458965	-0.435105	-0.0359569	0.077685	0.0416574	-0.0398398	0.181818	0.212013	0.231171	-0.185762	0.156636	0.0825362	0.224942	0.214508	0.371612	0.28885	0.0325038	-0.0577806	0.026345	0.00490728	-0.0927917
Serum TNF-α	-0.421006	-0.203582	-0.266103	-0.38405	-0.345726	-0.14219	-0.13072	-0.141745	-0.259318	-0.0366411	-0.398339	-0.462126	-0.346068	-0.412444	-0.400063	-0.171728	-0.377087	-0.18671	-0.243074	-0.34689	-0.259937	-0.0219137	0.0963936	0.118302	-0.0747913	0.33708	0.241184	0.3251	-0.00400489	0.28972	0.180443	0.372497	0.228219	0.205247	0.338364	0.0778345	0.132166	0.159519	-0.105906	-0.0747822
Serum LPS	-0.465903	-0.0718576	-0.189321	-0.227197	-0.26867	-0.357326	-0.0082387	-0.0320392	-0.28205	0.0432072	-0.509073	-0.5124	-0.450315	-0.270818	-0.480374	-0.221915	-0.405211	-0.277054	-0.298233	-0.470431	-0.378998	0.0555085	0.110184	0.197594	-0.0260405	0.34383	0.146162	0.343976	-0.253393	0.331739	-0.0171301	0.367338	0.197819	0.0850356	0.356057	-0.0457799	0.147598	0.0366539	-0.0601787	-0.240538
Dextran-FITC	-0.430081	-0.0438265	-0.134149	-0.242566	-0.200557	-0.349538	-0.0264974	0.0191345	-0.187884	0.12049	-0.389718	-0.513258	-0.35583	-0.473753	-0.442589	-0.156578	-0.334797	-0.269757	-0.238758	-0.390487	-0.276135	0.0966342	0.111964	0.295166	0.0758958	0.440414	0.287653	0.454111	-0.134594	0.415619	-0.0424917	0.482145	0.206053	0.224753	0.375505	-0.0391418	0.17563	0.0641443	-0.0999535	-0.270567
Adjusted P Value	Parabacteroides goldsteinii	Flintibacter butyricus	Ruminococcus gnavus	Intestinimonas butyriciproducens	Clostridium cocleatum	Lactococcus lactis	Lactobacillus johnsonii	Clostridium viride	Anaerotruncus colihominis	Lactobacillus reuteri	Ruminococcus flavefaciens	Butyrivibrio hungatei	Butyrivibrio proteoclasticus	Ochrobactrum anthropi	Ruminococcus bromii	Achromobacter insolitus	Delftia acidovorans	Haemophilus haemolyticus	Pseudobutyrivibrio ruminis	Lachnospira pectinoschiza	Butyrivibrio fibrisolvens	Butyricicoccus pullicaecorum	Lactobacillus animalis	Akkermansia muciniphila	Pseudoflavonifractor capillosus	Flavonifractor plautii	Bacteroides acidifaciens	Mucispirillum schaedleri	Pseudomonas aeruginosa	Dorea longicatena	Escherichia coli	Romboutsia timonensis	Shewanella algae	Sphingomonas echinoides	Bifidobacterium pseudolongum	Streptococcus dentisani	Peptoniphilus gorbachii	Serratia marcescens	Corynebacterium tuberculostearicum	Ralstonia pickettii
Body weight change	0.342098	0.985971	0.722023	0.326307	0.659889	0.794974	1	0.773552	0.80088	1	0.204687	0.291958	0.443007	0.103955	0.378498	1	0.240818	0.998719	0.564999	0.328297	0.438614	0.901251	0.901251	0.722023	1	0.489853	0.572357	0.677023	0.760961	0.61196	0.81813	0.411594	0.828065	0.564999	0.342098	1	0.840096	0.955278	1	0.949596
Visceral fat pad	0.464429	0.472729	0.721315	0.244887	0.564999	1	1	0.443119	0.566874	1	0.184616	0.263258	0.425174	0.61196	0.409061	0.901251	0.248223	0.988824	0.726521	0.267069	0.521244	0.722023	0.985971	1	0.722023	0.602266	0.721315	0.533498	0.947625	0.726521	0.375972	0.564999	0.485708	0.666539	0.520183	0.659889	0.907915	0.722023	0.994923	1
Pathological CLS score	0.103955	0.985971	0.705519	0.564999	0.553381	0.240818	1	0.983632	0.267069	0.985971	0.0986582	0.0869188	0.0920018	0.193386	0.0869188	0.356319	0.267069	0.267069	0.0920018	0.135633	0.0920018	0.820505	0.428643	0.327547	0.760961	0.204526	0.659889	0.244887	0.901251	0.184616	1	0.119678	0.391576	0.368955	0.14629	0.828065	0.484614	0.923036	0.331023	0.482077
Pathological NAI score	0.0920018	0.61196	0.484614	0.240818	0.378498	0.484614	0.645715	0.775006	0.356319	0.950989	0.0920018	0.0920018	0.0920018	0.0920018	0.0869188	0.557128	0.109086	0.327002	0.291691	0.0920018	0.240818	0.985971	1	0.596353	1	0.291691	0.564999	0.334223	0.754377	0.308233	0.7368	0.185187	0.317189	0.378644	0.142601	1	1	0.985971	1	0.726521
HOMA-IR index	0.378498	0.773472	0.677023	0.429759	0.547662	0.721315	0.556114	0.739618	0.67501	0.916437	0.0986582	0.317189	0.267069	0.61196	0.240818	0.828065	0.592259	0.842804	0.443119	0.240818	0.261423	1	0.722023	0.883118	1	0.659889	0.564999	0.828065	0.721315	0.841536	0.721315	0.596353	0.50577	0.520183	0.425174	0.884456	0.48745	1	0.983632	0.985971
Serum IL-1β	0.267069	0.659889	0.718725	0.428275	0.476069	0.476069	0.947625	0.775669	0.520163	1	0.0920018	0.0920018	0.150726	0.484614	0.103955	0.830854	0.343405	0.721315	0.163813	0.130919	0.153668	0.989055	0.901251	0.985971	0.985971	0.61196	0.553613	0.50577	0.606472	0.689581	0.88767	0.520163	0.547662	0.240818	0.379884	0.998619	0.950989	1	1	0.847808
Serum TNF-α	0.180328	0.564999	0.428643	0.239718	0.267069	0.722023	0.739618	0.722023	0.443007	0.988824	0.204687	0.127768	0.267069	0.185187	0.204687	0.649374	0.240818	0.604782	0.484614	0.267069	0.443007	1	0.840096	0.775669	0.901251	0.284642	0.484614	0.308233	1	0.379369	0.614902	0.240818	0.515773	0.564999	0.283131	0.901251	0.738236	0.680711	0.820505	0.901251
Serum LPS	0.123364	0.907915	0.6009	0.517537	0.426293	0.263258	1	0.998619	0.399427	0.985971	0.0920018	0.0920018	0.13921	0.425174	0.109086	0.521244	0.199014	0.411594	0.368955	0.119678	0.240818	0.955278	0.80492	0.572357	1	0.267069	0.721315	0.267069	0.460554	0.291691	1	0.244887	0.572357	0.883118	0.263258	0.985971	0.721315	0.988824	0.947625	0.484614
Dextran-FITC	0.163032	0.985971	0.734151	0.484614	0.566874	0.267069	1	1	0.602266	0.773552	0.224546	0.0920018	0.263258	0.118928	0.14629	0.689581	0.289823	0.425174	0.484646	0.224546	0.412416	0.840096	0.80088	0.375697	0.901251	0.147845	0.381794	0.135633	0.734151	0.184616	0.985971	0.109086	0.564999	0.520163	0.240818	0.985971	0.635822	0.937115	0.830854	0.425174
P values in red are statistically significant (<0.05). Correction for multiple testing was done using the false discovery rate method.

## Sheet: Dataset 4.2
Supplementary dataset S4.2. Spearman correlation analysis between the bacterial species identified and obesity traits
Parameters	Obesity Traits	r Value	Adjusted P Value
P. goldsteinii (%)	Body weight change	-0.664615	3.31514e-05
P. goldsteinii (%)	Visceral fat pad	-0.529231	0.0004557
P. goldsteinii (%)	Pathological CLS score	-0.387595	0.00324185
P. goldsteinii (%)	Pathological NAI score	-0.525803	0.0004557
P. goldsteinii (%)	HOMA-IR index	-0.519331	0.00048206
P. goldsteinii (%)	Serum IL-1β	-0.627692	6.84501e-05
P. goldsteinii (%)	Serum TNF-α	-0.727692	1.32463e-05
P. goldsteinii (%)	Serum LPS	-0.688462	2.98269e-05
P. goldsteinii (%)	Dextran-FITC	-0.676154	3.11731e-05
P. goldsteinii (copy)	Body weight change	-0.663974	3.31514e-05
P. goldsteinii (copy)	Visceral fat pad	-0.727448	1.32463e-05
P. goldsteinii (copy)	Pathological CLS score	-0.564866	0.000244616
P. goldsteinii (copy)	Pathological NAI score	-0.639345	5.53674e-05
P. goldsteinii (copy)	HOMA-IR index	-0.676029	3.11731e-05
P. goldsteinii (copy)	Serum IL-1β	-0.69321	2.98269e-05
P. goldsteinii (copy)	Serum TNF-α	-0.816311	6.83923e-07
P. goldsteinii (copy)	Serum LPS	-0.590883	0.000151035
P. goldsteinii (copy)	Dextran-FITC	-0.661666	3.31514e-05
P values were adjusted using the false discovery rate procedure.
